1 **Transient dynamics in plant-pollinator networks: Fewer but higher quality of pollinator**  
2 **visits determines plant invasion success**

3 **Abstract:** Invasive plants often use mutualisms to establish in their new habitats and tend to be  
4 visited by resident pollinators similarly or more frequently than native plants. The quality and  
5 resulting reproductive success of those visits, however, have rarely been studied in a network  
6 context. Here, we use a dynamic model to evaluate the invasion success and impacts on natives  
7 of various types of non-native plant species into thousands of plant-pollinator networks of  
8 varying structure. We found that non-native plants producing high amounts of floral rewards but  
9 visited by few pollinators at the moment of their introduction were the only plant species able to  
10 invade the networks. This result is determined by the transient dynamics occurring right after the  
11 plant introduction, when the pollinator species visiting the introduced plant are low in abundance  
12 so it takes them a large amount of foraging effort to deplete the non-native rewards to the reward  
13 threshold that determines the equilibrium of the system. This large increase in foraging effort  
14 strongly increases the quality of their visits to the introduced plant which allows the plant to  
15 invade. Native pollinators visiting the successful invader increased their abundance but the  
16 reallocation of their foraging effort from the native plants to the invader reduced the quantity and  
17 quality of visits to native plants and made the networks more modular and nested. These effects  
18 were buffered by plant richness. Interestingly, changes in visitation structure only caused a  
19 minimal decline in native plant abundance and no extinctions. Our results call for evaluating the  
20 impact of invasive plants not only on visitation rates and network structure, but also on processes  
21 beyond pollination including seed production and recruitment.

22 **Keywords:** Species invasions, impacts on natives, adaptive foraging, floral rewards dynamics,  
23 pollinator visit quality, mutualism models.

## 24 **Introduction**

25           Species invasions are one of the six global change drivers threatening biodiversity  
26 worldwide (Tylianakis et al. 2008). Plants consist of the largest and most studied group of  
27 invasive species globally (Pyšek et al. 2008, Downey and Richardson 2016), which often use  
28 mutualisms to establish in their new habitats (Richardson et al. 2000, Traveset and Richardson  
29 2014, Parra-Tabla and Arceo-Gómez 2021). In particular, the interaction of non-native plants  
30 with resident pollinators (native or non-native) plays an important role in the reproductive  
31 success of invasive plants (Ghazoul 2002, Traveset and Richardson 2014, Parra-Tabla and  
32 Arceo-Gómez 2021). Studies analyzing the interactions of non-native plants within plant-  
33 pollinator networks indicate that these species are well-integrated into the networks by showing  
34 that they share flower visitors with native plants (Aizen et al. 2008, Bartomeus et al. 2008,  
35 Kaiser-Bunbury et al. 2011, Traveset et al. 2013, Montero-Castaño and Vilà 2017) or that they  
36 are visited either similarly or more frequently than the natives (Lopezaraiza-Mikel et al. 2007,  
37 Montero-Castaño and Vilà 2017, Parra-Tabla et al. 2019, Seitz et al. 2020). However, the long-  
38 term persistence of non-native plants not only depends on the quantity of visits they receive from  
39 pollinators in their new community but also on the efficiency of those pollinators in transporting  
40 their pollen and their consequent reproductive success (Parra-Tabla and Arceo-Gómez 2021).

41           The effect of these two key factors (i.e., pollinator efficiency and reproductive success)  
42 on plant invasions have been rarely studied in the context of plant-pollinator networks (Parra-  
43 Tabla and Arceo-Gómez 2021). Pollinator efficiency (in terms of pollinator contribution to seed  
44 production) has recently been studied in the context of plant-pollinator networks, but not  
45 associated with plant invasions. De Santiago-Hernández et al. (2019) shows that networks built  
46 using pollinator efficiency data are not nested, and are more modular and specialized than

47 networks built with visitation data. This study also shows that only 59% of floral visitors  
48 contributed to seed production.

49         These findings suggest that a non-native plant receiving many pollinator visits not  
50 necessarily will persist in its new community because those visits might not contribute to its  
51 reproduction success. Indeed, non-native plants receiving few but high quality visits can also  
52 persist in their new community. Thompson and Knight (2018) show that non-native plants can  
53 exhibit high reproductive success when visited by only one or a few pollinator species. In  
54 contrast, other studies find that several invasive species exhibit generalized floral traits (Parra-  
55 Tabla and Arceo-Gómez 2021), are visited by many and abundant pollinator species (Bartomeus  
56 et al. 2008, Vilà et al. 2009), and tend to be network hubs (Albrecht et al., 2014). Furthermore,  
57 these contrasting empirical patterns have been obtained for plant species that had already  
58 invaded the networks and not necessarily explain their invasion success from the early stages of  
59 their introduction. Therefore, we submit our field lacks a clear understanding of the non-native  
60 traits and network characteristics that predict the invasion success of a recently introduced plant  
61 species. Here, we develop such predictive understanding by evaluating the effects of non-native  
62 traits and network characteristics on the invasion success and impacts on natives of introduced  
63 plant species, using the dynamic plant-pollinator network model of Valdovinos et al. (2013).  
64 Specifically, we evaluate the effects of the number and abundance of pollinator species visiting  
65 the introduced species, the quantity and quality of those pollinators' visits, and the effects of  
66 those visits on the reproduction and population growth of the introduced species.

67         Invasive plants can affect plant-pollinator networks negatively by competing with native  
68 plants for pollinators or by increasing heterospecific pollen transfer (Traveset and Richardson  
69 2006, 2014, Morales and Traveset 2009, Arceo-Gómez and Ashman 2016, Kaiser-Bunbury et al.

70 2017, Parra-Tabla et al. 2021), but also have null (Kaiser-Bunbury et al. 2011) or even positive  
71 effects on the networks via increased abundance of native pollinators (Lopezaraiza-Mikel et al.  
72 2007, Bartomeus et al. 2008, Carvalheiro et al. 2008, Valdovinos et al. 2009). These plants can  
73 also affect the networks' structure by modifying the strength (Kaiser-Bunbury et al. 2017) and  
74 number (Bartomeus et al. 2008, Valdovinos et al. 2009) of species interactions, the natives'  
75 position within the network (Aizen et al. 2008, Albrecht et al. 2014), as well as, the network-  
76 level metrics such as modularity, nestedness, or connectance (Bartomeus et al. 2008, Valdovinos  
77 et al. 2009). However, the mechanisms behind those network changes and the impacts of those  
78 network changes on the native species are not entirely understood (Parra-Tabla and Arceo-  
79 Gómez 2021). Here, we use our modeling approach to evaluate how adaptive foraging of  
80 resident pollinators, differences in floral rewards offered by native and introduced species, and  
81 the population growth of the introduced species drive changes in network structure, and how  
82 those changes impact native species.

83         Previous work used the same mathematical model we use here to evaluate the invasion  
84 success and impacts of non-native pollinators on plant-pollinator networks (Valdovinos et al.  
85 2018). However, the dynamics of pollinators and plant in this model are very different. That is,  
86 the equations describing their population dynamics encapsulate biological mechanisms that differ  
87 drastically between pollinators and plants (see Eqs. 1 and 2 in Methods), which result in very  
88 different dynamical outputs and effects on other species in the network (Valdovinos et al. 2013,  
89 2016, 2018, Valdovinos and Marsland 2020). Moreover, these differences in modeled population  
90 dynamics may provide insights into the mechanisms influencing the invasion processes of  
91 pollinators vs. plants in ecological networks. Therefore, we evaluate the invasion success and  
92 impacts of non-native plants on plant-pollinator networks by testing three hypotheses: 1) non-

93 native plants producing more floral rewards than native plants will attract resident pollinators  
94 and secure their reproduction success; 2) non-native plants visited by fewer pollinators but  
95 receiving higher quality of visits will more likely invade the networks than non-natives visited by  
96 more pollinators but receiving lower quality of visits; 3) changes in network structure produced  
97 by the introduction of non-native plant species will not necessarily impact the reproduction  
98 success of native plants.

99

## 100 **Materials and methods**

### 101 *Binary vs. weighted network structures*

102         The binary structure of networks represents species as nodes and their interactions as  
103 binary links, while the weighted structure provides information about the strength of those  
104 interactions as weighted links. We use the visitation rate of each pollinator species to each plant  
105 species (function  $V_{ij}$  in Table 1) to determine the weighted structure, which depends on the  
106 abundances of plant and pollinator species, the pollinators' foraging efforts, and visitation  
107 efficiency. Empirical studies most often use this definition of weighted structures because  
108 frequency of visits is what researchers most often record in the field (e.g., Bartomeus et al. 2008,  
109 Vilà et al. 2009, Kaiser-Bunbury et al. 2011, 2017). We used the 1200 binary structures from  
110 Valdovinos et al. (2018), composed of three sets of 400 networks centered at three combinations  
111 of richness (S) and connectance (C), with values:  $S = 40$  and  $C = 0.25$ ,  $S = 90$  and  $C = 0.15$ , and  
112  $S = 200$  and  $C = 0.06$ . These combinations represent three points in the empirically observed  
113 relation between richness and connectance, and recreate structural patterns of empirically  
114 observed networks including their heterogenous degree distribution and nestedness. Half of the  
115 networks at each set are nested and the other half, non-nested, with NODFst values ranging

116 between -0.33 and 2.3. These networks maintain the empirically observed mean ratio of animal  
 117 to plant species of 2.5 (Jordano et al. 2003). The weighted structures emerged from the network  
 118 dynamics (see below).

119

## 120 *Network dynamics*

121 We used Valdovinos et al.'s (2013) model to simulate the population dynamics of each  
 122 plant (Eq. 1) and pollinator (Eq. 2) species of the network, as well as the dynamics of floral  
 123 rewards (Eq. 3) of each plant species, and the foraging effort (Eq. 3) that each pollinator species  
 124 (per-capita) assigns to each plant species as follows (see Table 1 for definition of functions,  
 125 parameters, and their values):

$$126 \quad \begin{array}{l} \text{population growth of plant sp } i \\ \frac{d\widehat{p}_i}{dt} \end{array} = \begin{array}{l} \text{reproduction reduced by plants' competition} \\ \gamma_i \sum_{j \in A_i} e_{ij} \sigma_{ij} V_{ij} \end{array} - \begin{array}{l} \text{mortality loss} \\ \widehat{\mu}_i^P p_i \end{array} \quad (1)$$

$$127 \quad \begin{array}{l} \text{population growth of animal sp } j \\ \frac{d\widehat{a}_j}{dt} \end{array} = \begin{array}{l} \text{recruit to adults from rewards consumption} \\ \sum_{i \in P_j} c_{ij} V_{ij} b_{ij} \frac{R_i}{p_i} \end{array} - \begin{array}{l} \text{mortality loss} \\ \widehat{\mu}_j^A a_j \end{array} \quad (2)$$

$$128 \quad \begin{array}{l} \text{floral-rewards dynamics of plant sp } i \\ \frac{d\widehat{R}_i}{dt} \end{array} = \begin{array}{l} \text{saturated production of rewards} \\ \beta_i p_i - \varphi_i R_i \end{array} - \begin{array}{l} \text{consumption by pollinators} \\ \sum_{j \in A_i} V_{ij} b_{ij} \frac{R_i}{p_i} \end{array} \quad (3)$$

$$129 \quad \begin{array}{l} \text{adaptive foraging} \\ \frac{d\widehat{\alpha}_{ij}}{dt} \end{array} = G_j \alpha_{ij} \left( \begin{array}{l} \text{R consumption from plant } i \\ \underbrace{c_{ij} \tau_{ij} b_{ij} R_i}_{\text{R consumption from plant } i} \end{array} - \begin{array}{l} \text{average R consumption from all } j' \text{'s plants} \\ \underbrace{\sum_{k \in P_j} \alpha_{kj} c_{kj} \tau_{kj} b_{kj} R_k}_{\text{average R consumption from all } j' \text{'s plants}} \end{array} \right) \quad (4)$$

131 We run the model for 10,000 timesteps prior to the plant introductions and another 10,000  
 132 timesteps after the introduction. We analyzed both the transient dynamics immediately after the  
 133 plant introduction (during the first 2,000 timesteps after the introduction) and the equilibrated  
 134 dynamics (at 10,000 timesteps). The simulations generally equilibrated at around 3,000  
 135 timesteps, so running them longer ensured we captured the dynamics at equilibrium.

136 **Table 1. Model state variables, functions, and parameters.**

| Definition                                                     | Symbol                                                                                               | Dimension                                                                             | Mean value                   |
|----------------------------------------------------------------|------------------------------------------------------------------------------------------------------|---------------------------------------------------------------------------------------|------------------------------|
| <b>State Variables</b>                                         |                                                                                                      |                                                                                       |                              |
| Density of plant population $i$                                | $p_i$                                                                                                | individuals area <sup>-1</sup>                                                        | 0.5*   <b>0.02</b>           |
| Density of animal population $j$                               | $a_j$                                                                                                | individuals area <sup>-1</sup>                                                        | 0.5*                         |
| Total density of floral resources of plant population $i$      | $R_i$                                                                                                | mass area <sup>-1</sup>                                                               | 0.5*   <b>0.01</b>           |
| Foraging effort of $j$ on $i$                                  | $\alpha_{ij}$                                                                                        | None                                                                                  | $1/k_{aj}$ *                 |
| <b>Functions</b>                                               |                                                                                                      |                                                                                       |                              |
| Visitation rate of $j$ to $i$ (quantity of visits)             | $V_{ij} = \alpha_{ij}\tau_j a_j p_i$                                                                 | visits area time <sup>-1</sup>                                                        | variable                     |
| Quality of visits (per-capita) of $j$ to $i$ (per-capita)      | $\sigma_{ij} = \frac{\varepsilon_i \alpha_{ij} p_i}{\sum_{k \in P_j} \varepsilon_k \alpha_{kj} p_k}$ | None                                                                                  | variable                     |
| Fraction of seeds $i$ that recruit to adults                   | $\gamma_i = g_i \left( 1 - \sum_{l \neq i \in P_j} u_l p_l - w_i p_i \right)$                        | None                                                                                  | variable                     |
| <b>Parameters</b>                                              |                                                                                                      |                                                                                       |                              |
| Visitation efficiency                                          | $\tau_{ij}$                                                                                          | visits area time <sup>-1</sup><br>individuals <sup>-1</sup> individuals <sup>-1</sup> | 1                            |
| Expected number of seeds produced by a pollination event       | $e_{ij}$                                                                                             | individuals visits <sup>-1</sup>                                                      | 0.8                          |
| Per capita mortality rate of plants                            | $\mu_i^P$                                                                                            | time <sup>-1</sup>                                                                    | 0.001                        |
| Conversion efficiency of floral resources to pollinator births | $c_{ij}$                                                                                             | individuals mass <sup>-1</sup>                                                        | 0.2                          |
| Per capita mortality rate of pollinators                       | $\mu_j^A$                                                                                            | time <sup>-1</sup>                                                                    | 0.001                        |
| Pollinator extraction efficiency of resource in each visit     | $b_{ij}$                                                                                             | individuals visits <sup>-1</sup>                                                      | 0.4                          |
| Maximum fraction of total seeds that recruit to plants         | $g_i$                                                                                                | None                                                                                  | 0.4                          |
| Inter-specific competition coefficient of plants               | $u_i$                                                                                                | area individuals <sup>-1</sup>                                                        | 0.06                         |
| Intra-specific competition coefficient of plants               | $w_i$                                                                                                | area individuals <sup>-1</sup>                                                        | 1.2                          |
| <b>Production rate of floral resources</b>                     | <b><math>\beta_i</math></b>                                                                          | <b>mass individuals<sup>-1</sup> time<sup>-1</sup></b>                                | <b>0.2   0.8<sup>A</sup></b> |

| <b>Attachability of pollen to pollinator's body</b> | $\epsilon_i$ | <b>None</b>        | <b>1   4<sup>A</sup></b> |
|-----------------------------------------------------|--------------|--------------------|--------------------------|
| Self-limitation parameter of resource production    | $\phi_{ij}$  | time <sup>-1</sup> | 0.04                     |
| Adaptation rate of foraging efforts of pollinators  | $G_j$        | None               | 2                        |

137 Values were drawn from a uniform random distribution with the specified mean, and variances of 10%  
 138 and 0% of means for plants' and animals' parameters, respectively. The second values in bold for  $p_i$  and  
 139  $R_i$  are the ones used for the introduced plant species. Superscripted A indicates the highest level used for  
 140 introduced plants. Asterisks indicate initial conditions.  $k_{aj}$  is the number of interactions of animal  $j$ .  
 141

142 *Non-native introductions*

143 We introduced 8 types of plant species to each network (one per simulation) based on all  
 144 combinations of two levels of three properties (see Table 2) at  $t = 10,000$ , with density equal to  
 145 the plant extinction threshold, 0.02, and reward density 0.02 times that of the average native to  
 146 keep the initial rewards density per plant similar between non-native and native plants.  
 147 Therefore, the introduced plant species always starts out at a double disadvantage with respect to  
 148 the native plants because its initial abundance ( $p_x = 0.02$ ), and the foraging effort pollinators  
 149 assign to it ( $\alpha_{xj} = 0.0001$ ) are very small compared to those of native plants at the moment of  
 150 its introduction (average  $p_i = 0.8, \alpha_{ij} = 0.1$ ). The extinction threshold was set in previous work  
 151 based on the Allee effect experienced by plants for the parameter values shown in Table 1  
 152 (Valdovinos et al. 2013, 2016, 2018).

153 The pollinator species that initially visited the introduced plant were chosen randomly  
 154 from: (1) all pollinator species, (2) most-generalist pollinator species, (3) most-specialist  
 155 pollinator species. These three options of “linkage algorithms” are called hereafter ‘random’,  
 156 ‘most connected’, and ‘least connected’, respectively. The foraging effort of native pollinators  
 157 initially visiting the introduced plant was set to 0.0001 (of a total of 1 summed over all the  
 158 interactions of the pollinator), which was subtracted from the highest effort of the pollinator so



159 the effect of the effort subtraction was null. We conducted a total of 28,800 plant introductions  
160 (1200 networks  $\times$  8 plant types  $\times$  3 linkage algorithms).

161 **Table 2. Properties of the non-native plants introduced.**

| Factor (property)                     | Description of level 1                                      | Description of level 2                                      |
|---------------------------------------|-------------------------------------------------------------|-------------------------------------------------------------|
| Generality (# links)                  | Specialist (average # links of 30% most specialist natives) | Generalist (average # links of 30% most generalist natives) |
| Pollen attachability ( $\epsilon_i$ ) | Same as average native                                      | Four times higher than average native*                      |
| Rewards production ( $\beta_i$ )      | Same as average native                                      | Four times higher than average native*                      |

162 \*We chose the high levels of pollen attachability and rewards production to be four times higher than  
163 those of the average natives, because those levels show clear effects of the properties. Different values did  
164 not change our qualitative results.

165

### 166 *Analysis of the simulation results*

167 We conducted a Classification and Regression Tree (CART) analysis using the software  
168 JMP to evaluate which properties of networks and introduced plants contributed most to their  
169 invasion success. We used five-fold cross validation to avoid overfitting. Network properties  
170 included species richness ( $S$ ), the ratio of plant to animal species, four measures of link density  
171 [connectance ( $C = L / A \times P$ , where  $L$  is the total number of links,  $A$  the number of pollinator  
172 species, and  $P$  the number of plant species), links per species ( $L/S$ ), links per plant species ( $L/P$ ),  
173 and links per animal species ( $L/A$ )], four measures of degree distribution (power law exponent  
174 for plants and animals, the standard deviation of animal generality and the standard deviation of  
175 plant vulnerability), four measures of niche overlap (the mean and maximum Jaccardian index  
176 for plants and animals), and nestedness (see Supplementary Methods). Introduced plant  
177 properties included the generality level, pollen attachability, rewards production, and the linkage  
178 algorithm. Network and introduced plant properties totaled 22 contributors for the analysis. We  
179 evaluated the effect of successful invasions (i.e., introduced plant species that persisted at high

180 density) on natives' persistence, density, quality and quantity of visits. These variables were  
181 measured right before the plant introduction ( $t = 10,000$ ), during the first 2,000 timesteps after  
182 the introductions (to understand the effects on natives of the initial introduction process), and at  
183 the end of the simulation ( $t = 20,000$ ). We evaluated the effect of plant invasions on the  
184 networks' weighted structure by calculating the networks' weighted nestedness and weighted  
185 modularity before and after the invasion. These metrics were calculated using the `nest.smdm()`  
186 and `computeModules()` functions, respectively, from the R package `bipartite`.

187

## 188 **Results**

189 All introduced plant species either went extinct or dramatically increased their density to  
190 that of native plants. Thus, we characterized the result of an introduction as either invasion  
191 failure or success. We found that specialist plants with high rewards production and high pollen  
192 attachability were the most successful invaders (see "Spec High R&P" in Fig. 1), which partly  
193 supports our first hypothesis (see Introduction). These plants invaded 93% of the times they were  
194 introduced into the networks, while the same plant type except for being generalist invaded only  
195 18% of the times (see "Gen High R&P" in Fig. 1A). Specialist plants with high production of  
196 rewards but average pollen attachability had an invasion success of 12% (see "Spec High R" in  
197 Fig. 1A). All other plant types never invaded. Our CART analyses (Table 3) confirm these  
198 results, showing that among the 22 factors analyzed (see Methods), high production of rewards  
199 contributed the most to the variation in invasion success, followed by being a specialist, and  
200 finally by having high pollen attachability.

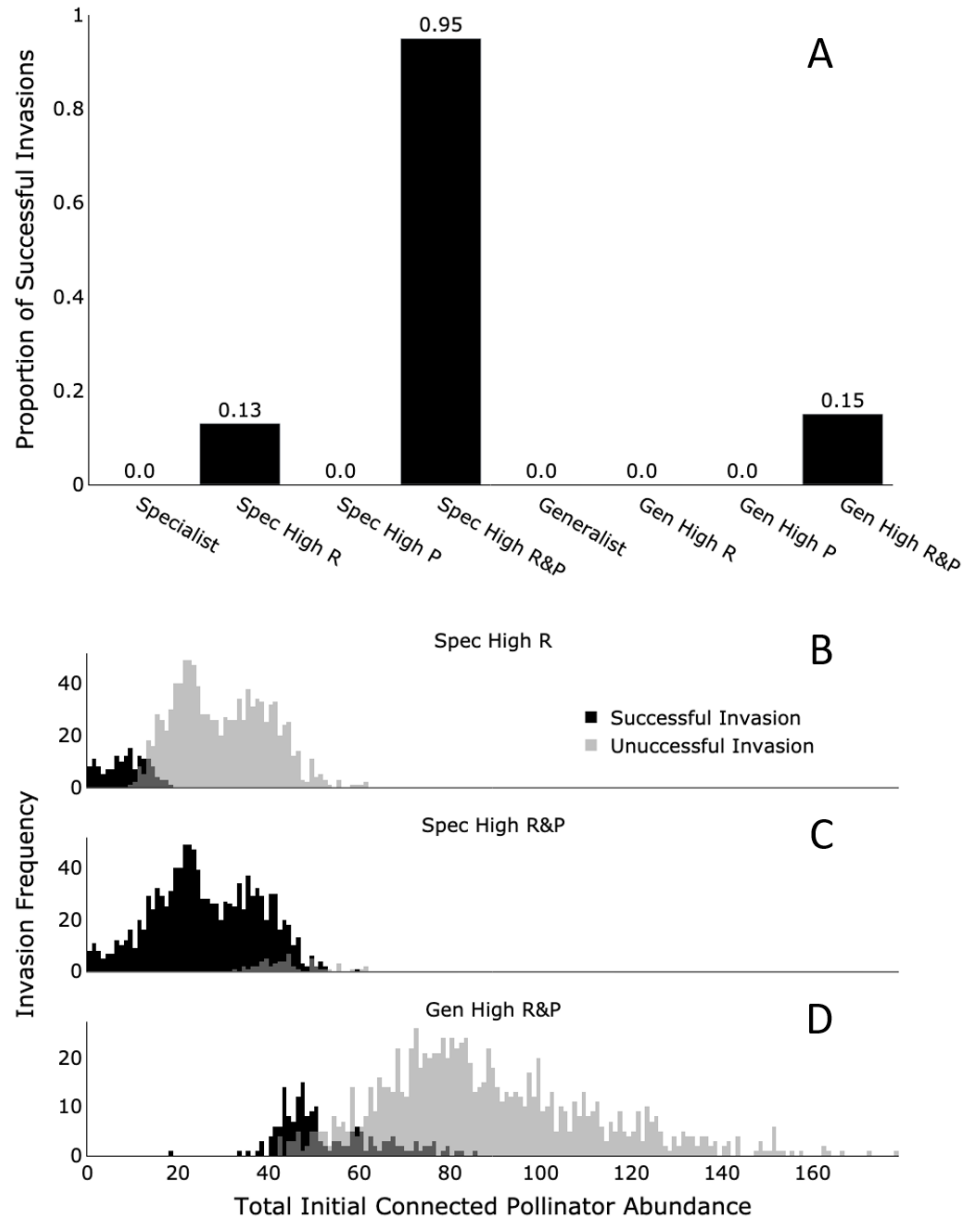

201

202 **Figure 1. Proportion of successful plant invasions of each introduced species type (A) and the effect**  
203 **of pollinator abundance initially visiting them on their invasion success (B-D).** Panel A shows ( $N =$   
204  $28,800$ ) that introduced plants visited by one or a few native pollinator species (Spec), high reward  
205 producers (High R), and with high pollen attachability (High P) most frequently invaded. Introduced  
206 plants visited by many different pollinator species (Gen) and exhibiting the average level of rewards  
207 production or pollen attachability found among native plants (indicated by omitting High R or P) never  
208 invade. Panels B, C, D show data ( $N = 3,600$ ; per panel) for the only three species types that successfully  
209 invaded the networks, that is, specialist plant species with high production of rewards (Spec High R),  
210 specialist plant species with high production of rewards and pollen attachability (Spec High R&P), and  
211 generalist plant species with high production of rewards and pollen attachability (Spec High R&P),  
212 respectively. Black and light gray bars represent successful and unsuccessful invasion, respectively, while  
213 medium gray indicate were those two bar types overlap.

214 We found that plants visited by fewer pollinators (in terms of abundance) at the moment  
 215 of their introduction most likely invaded (Fig. 1B-C), which partly supports our second  
 216 hypothesis. Therefore, we conducted a second (refined, see Table 3) CART analysis in which we  
 217 incorporated the initial pollinator abundance connected to the introduced plant as a contributor  
 218 for the analysis. This refined analysis shows that the total abundance of pollinators visiting the  
 219 introduced plant species better predicts its invasion success than the number of pollinator species  
 220 visiting it (note these two variables are strongly and positively correlated Fig. S1).

221 **Table 3. Classification and Regression Tree (CART) analyses for invasion success.**

|                                | <b>Initial analysis</b>                                                                                           | <b>Refined analysis*</b>                                                                                                     |
|--------------------------------|-------------------------------------------------------------------------------------------------------------------|------------------------------------------------------------------------------------------------------------------------------|
| <b>Five fold R<sup>2</sup></b> | 0.82                                                                                                              | 0.87                                                                                                                         |
| <b>Main Contributions</b>      | High reward producer (34%)<br>More specialized (25%)<br>High pollen attachability (22%)<br>Linkage algorithm (5%) | High reward producer (36%)<br>*Initial pollinator abundance connected to non-native (33%)<br>High pollen attachability (31%) |

222  
 223 The initial analysis followed the simulation design (see Methods). The asterisk indicates that the refined  
 224 analysis (as opposed to the initial) included the initial pollinator abundance connected to the non-native  
 225 plant as a new contributor for the CART analysis, which better predicted the plant invasion success than  
 226 the trait of being more specialized (i.e., visited by fewer pollinator species).

227  
 228 The explanation for introduced plants visited by fewer pollinators being more likely to  
 229 invade resides in the reward threshold determining whether a plant species attracts sustained  
 230 visitation or not (hereafter “reward threshold”; Fig 2, Appendix S1, Fig. S2). When the reward  
 231 density of a plant species drops from such threshold, the pollinators stop visiting it and the plant  
 232 species declines in abundance which, in turn, declines the reward density of its population even  
 233 further (i.e., fewer flowers available for pollinators). This vicious cycle causes the irreversible  
 234 process of plant species going extinct once their rewards density drops below the reward  
 235 threshold. All plant species have the same reward threshold at each simulation (Eq. S2 in  
 236 Appendix S1, R\* in Fig S2), as a result of the “ideal-free distribution” caused by pollinators  
 237 being adaptive foragers (Valdovinos et al. 2013), and its value is determined by the parameter

238 values drawn randomly prior to running each simulation. However, the dynamics of floral  
239 rewards differ among plant species given that they have different per-capita production rate of  
240 rewards and are visited by different pollinator species with different abundances and foraging  
241 efforts.

242 If the reward density of the introduced species stays at or above this reward threshold  
243 (black curve in Fig. 2A), the plant population keeps attracting pollinators for long enough to  
244 receive high quality of visits (black curve in Fig. 2B), which ensures its population growth and,  
245 therefore, its invasion success (Figs. S3A-D). If the reward density of the plant population drops  
246 from this threshold (gray curve in Fig. 2A) due to high consumption by pollinators, the  
247 pollinators stop visiting it and reassign their visits to other plant species in their diet whose  
248 rewards are at or above the threshold. Consequently, pollinators do not increase their foraging  
249 efforts to the introduced plant fast enough (i.e., before depleting its rewards) to provide the plant  
250 with the high quality of visits (compare gray with black curve in Fig 2B; Fig. S2) needed for its  
251 invasion, and the plant species goes extinct. See Appendix S1 for a mathematical analysis  
252 demonstrating that our results are general.

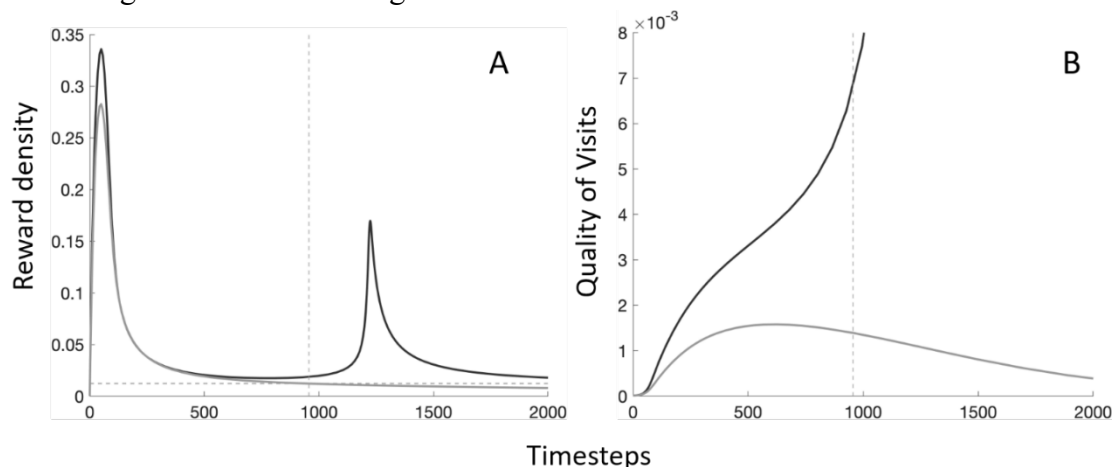

253 **Figure 2. Reward threshold that determines invasion success during the transient dynamics.**  
254 Transient dynamics are defined as the non-asymptotic dynamical regimes that persist for less than one to  
255 ‘as many as tens of generations’ (Hastings et al. 2018). Two simulations (one of the successful, black  
256 curves, and one of the failed, gray curves, invasions) for the introduction of specialist plant species with  
257 high production of rewards and pollen attachability (Spec High R&P) chosen from the data shown in Fig.

258 1C, to illustrate: **A.** An introduced plant species fails to invade (gray curve) when its rewards drop from  
259 the reward threshold (horizontal dashed line). The vertical dashed line indicates the timestep at which the  
260 reward threshold was crossed for the failed invasion. **B.** The quality of visits received by the introduced  
261 plant species does not increase enough for the failed invasion before the reward threshold is reached, so it  
262 goes extinct (see Fig S2). In the successful invasion, the introduced plant species is able to attract the  
263 pollinators' foraging effort fast enough during the transient dynamics that obtains enough quality of visits  
264 to persist before the threshold is met. The second peak observed in panel A corresponds to the increase  
265 floral rewards due to the increase in abundance of the introduced species that successfully invades, but  
266 then get depleted again to the reward density determining the system's equilibrium (see Eq. S2 in  
267 Appendix S1). All successful and failed invasions look qualitatively the same as these figures.  
268

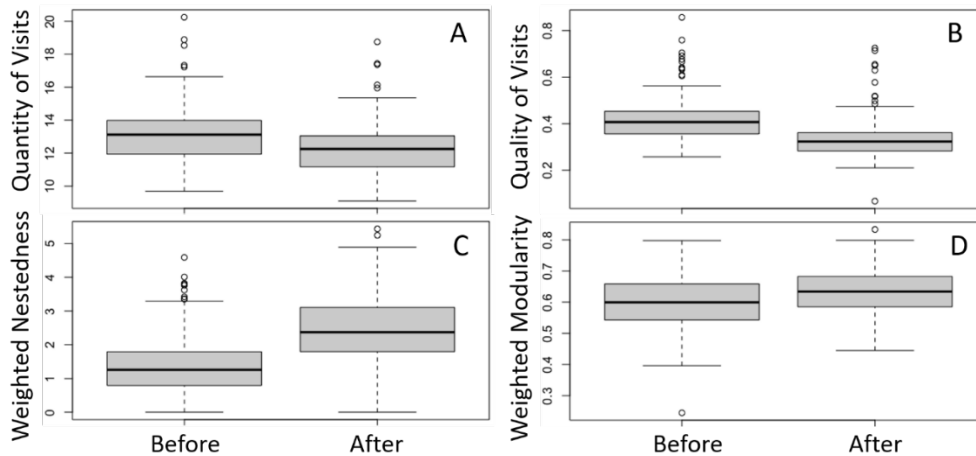

269

270 **Figure 3. Effect of plant invasions on the quantity (A) and quality (B) of visits received by native**  
271 **plants and the networks' weighted nestedness (C) and modularity (D).** Box plots for these variables  
272 before (at 10,000 timesteps) and after (at 20,000 timesteps) the plant introduction for all the networks  
273 with 40 species and connectance 0.25 that were invaded by the three plant types that successfully invaded  
274 the networks (see Fig 1A). The middle bar, box, and error bars represent the mean, interquartile range,  
275 and standard deviations of each distribution. Welch Two Sample t-test for A, B, C, and D provided strong  
276 evidence for significant differences between the variable means before and after invasion, all of which  
277 generated p-values less than  $10^{-7}$  (see Table S2).  
278

279

280 We evaluated the effects of the successful invasions on the native species and on the  
281 networks' weighted structure. We found that the native plants that shared pollinator species with  
282 the successful invaders received lower quantity (Figs. 3A and 4A) and quality (Figs. 3B and 4B)  
283 of visits after the plant invasion, which is explained by pollinators re-assigning their foraging  
284 efforts from the native to the invasive plant species (Fig. 4D). However, the native plants only  
285 slightly decreased their density (Fig. 4C) and never went extinct (data not shown) as a  
286 consequence of the invasion. The magnitude of this negative effect on the density of native

286 plants was reduced by the number of plant species in the network (Fig. 4G). Conversely, the  
287 plant invasions increased the density of native pollinators (Fig. 4F), effect that was also  
288 attenuated by the number of plant species in the network (Fig. 4H). Finally, the plant invasions  
289 increased the networks' weighted nestedness (Fig. 3C) and modularity (Fig. 3D). See Table S1  
290 for all the statistics of the Welch Two Sample t-test comparing weighted nestedness and  
291 modularity for all networks, groups of networks, and by the plant types introduced. Table S2  
292 conceptually summarizes Table S1 for easy understanding of the trends.

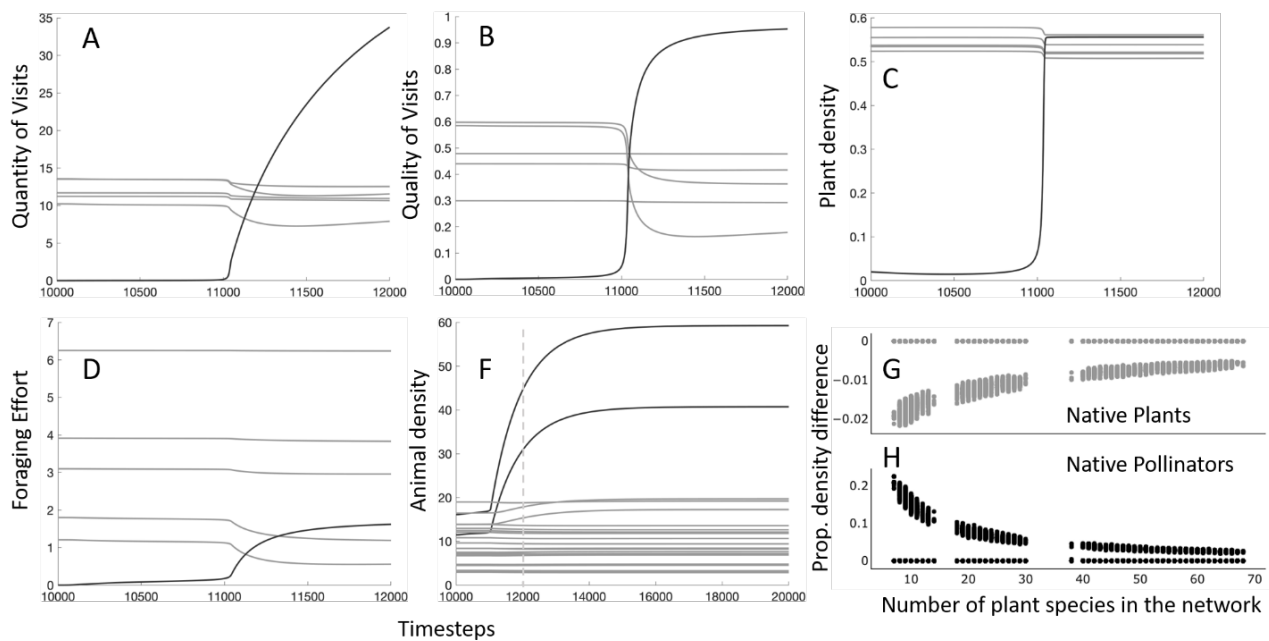

293 **Figure 4: Effects of plant invasions on native plants (A-D, G) and pollinators (F and H) right after**  
294 **the plant introduction.** Panels A-F show time series for only one simulation chosen from a successful  
295 invasion of Spec High R&P, but all simulations with successful invasions show qualitatively similar  
296 patterns. Quantity (A) and quality (B) of visits, density (C), and foraging effort assigned to the invasive  
297 plant species (black) increase over time, while those of native plant species (gray) sharing pollinators with  
298 the invasive species decrease. Panel F shows the increase in density of pollinator species (black) visiting  
299 the invasive species in comparison to those (gray) not visiting the invasive. Panels G-H show the results  
300 of all simulations in which specialist plant species with high production of rewards and pollen  
301 attachability (Spec High R&P) were introduced (Fig. 1C), with each dot representing one simulation.  
302 Plant richness decreases the magnitude of the negative (G) and positive (H) effects of the plant invasion  
303 on the native plants and pollinators, respectively, which is consistent with Elton's (1958) prediction of  
304 richer systems being more robust to species invasions than poorer systems.  
305

## 306 **Discussion**

307 Ecologists are increasingly calling for theory focusing on transient as opposed to  
308 equilibrium dynamics (Hastings et al. 2018, 2021, Morozov et al. 2020, Francis et al. 2021,  
309 Abbott et al. 2021). Many ecological phenomena occur before the system reaches an equilibrium,  
310 which may never be reached due to the effects of stochasticity and perturbations (Hastings et al.  
311 2018, Abbott et al. 2021). The latter strengthens the importance of studying ecological transients  
312 especially for evaluating how ecological systems respond to perturbations caused by global  
313 change. Dynamical transients are defined as the non-asymptotic dynamical regimes that persist  
314 for less than one to ‘as many as tens of generations’ (Hastings et al. 2018). To the best of our  
315 knowledge, our work is one of the first revealing a dynamical transient in ecological networks, as  
316 theory on ecological networks has traditionally focused on equilibrium dynamics (e.g.,  
317 Bascompte et al. 2006, Bastolla et al. 2009, Pascual-García and Bastolla 2017, Valdovinos and  
318 Marsland 2020). Specifically, we found that — due to the transient dynamics that occur right  
319 after the plant introduction — non-native plants producing high amounts of floral rewards but  
320 visited by few pollinators at the moment of their introduction were the only plant species able to  
321 invade the networks. These dynamics occur when the pollinator species visiting the introduced  
322 plant species are low in abundance so it takes them a large amount of foraging effort to deplete  
323 the rewards of the plant to the reward threshold that determines the system’s equilibrium. This  
324 large increase in foraging effort strongly increases the quality of visits received by the introduced  
325 plant which allows the plant to invade the network, and increases the abundance of the  
326 pollinators visiting the successful invader.

327 The transient dynamics we found in our study support our three hypotheses, that is: 1)  
328 introduced plant species producing more floral rewards than natives were more likely to invade,



329 2) introduced species visited by more pollinators but receiving lower quality of visits were less  
330 likely to invade, and 3) changes in visitation network structure caused by plant invasions  
331 minimally (if at all) affected the reproduction success of native plants. In addition, we found that  
332 among the 22 factors evaluated (see Methods), traits of non-native plants (i.e., high rewards  
333 production, being visited by only one or a few pollinator species, and high pollen attachability)  
334 determined their invasion success, while the number of plant species in the network influenced  
335 the magnitude of the invasions' impacts on natives. Below, we discuss each of our results with  
336 respect of the empirical evidence found in the literature.

337         Our finding of higher invasion success of plants offering higher amounts of floral  
338 rewards is consistent with empirical research showing that plants that successfully invade plant-  
339 pollinator networks typically offer large amounts of floral rewards in large, showy flowers  
340 (Lopezaraiza-Mikel et al. 2007, Muñoz and Cavieres 2008, Padrón et al. 2009, Pyšek et al. 2011,  
341 Kaiser-Bunbury et al. 2011). Our finding of higher invasion success of plants attracting fewer  
342 pollinator species is consistent with empirical work showing that non-native plants can exhibit  
343 high reproductive success when visited by only one or a few pollinator species (Thompson and  
344 Knight 2018). This finding is also consistent — although due to a different biological mechanism  
345 — with empirical data showing that too many pollinator visits can reduce the fitness of the plant  
346 receiving those visits (Morris et al. 2010, Aizen et al. 2014), especially when the abundance of  
347 pollinators is disproportionally higher than that of the plant population. Our work shows that  
348 non-native plants that are introduced at very low abundances but visited by abundant pollinators  
349 receive too many visits that are low in quality and, therefore, go extinct after their rewards are  
350 depleted below the reward threshold capable to attract pollinators.

351            Empirical data also support our findings that plant invasions can increase the abundance  
352 of native pollinators (Lopezaraiza–Mikel et al. 2007, Bartomeus et al. 2008, Carvalheiro et al.  
353 2008), but decrease the quantity and quality of visits received by native plants (Traveset and  
354 Richardson 2006, 2014, Morales and Traveset 2009, Arceo-Gómez and Ashman 2016, Kaiser-  
355 Bunbury et al. 2017, Parra-Tabla et al. 2021). However, the field still lacks research on how  
356 those effects on visitation rates translate to effects on the reproduction success and population  
357 growth of native plants (Parra-Tabla and Arceo-Gómez 2021). Our work can help guide future  
358 empirical research by showing that when other stages of plant reproduction are considered  
359 beyond visitation (i.e., successful pollination events, seed production, recruitment), a decrease in  
360 quantity or quality of visits does not necessarily translate into a decrease in plant reproduction or  
361 reduction of plant growth.

362            We found that plant invasions made the network structures more modular and nested,  
363 which is consistent with previous theoretical (Valdovinos et al. 2009) and empirical (Bartomeus  
364 et al. 2008) work, respectively. Valdovinos et al. (2009) using the metacommunity model  
365 developed by Fortuna and Bascompte (2006) found that networks with non-native plants were  
366 more modular than networks from which the non-natives were removed. Note that here we only  
367 evaluated weighted modularity because we are interested in foraging-effort changes driven by  
368 adaptive foraging in response to plant invasions, while the model used by Valdovinos et al.  
369 (2009) did not incorporate adaptive foraging. In addition, our simulations did not show changes  
370 in the binary structure of the networks because none of the species went extinct. That is, all  
371 changes in network structure corresponded to changes in visitation rates. Bartomeus et al. (2008)  
372 studied the effects of two different non-native plant species on the visits received by native  
373 plants and the binary structure of the invaded network. They found that one of the non-native

374 species (*Carpobrotus*) facilitated pollinator visits to the natives, while the other (*Opuntia*)  
375 competed for those visits with the natives and made the binary structure more nested.

376 Other empirical studies did not find a clear relation between plant invasions and changes  
377 in the binary structure of the invaded networks (Vilà et al. 2009, Albrecht et al. 2014, Parra-  
378 Tabla et al. 2019). For example, Albrecht et al. (2014) found that changes in binary modularity  
379 was case specific, with three out of the seven studied systems showing a decrease in modularity  
380 (caused by the high level generalism of the invasive plants) and one showing an increase in  
381 modularity (not a generalist invasive plant). Our work can guide further research investigating  
382 the mechanisms by which these networks may become more (or less) nested and modular due to  
383 plant invasions by showing how adaptive foraging of native pollinators can cause changes in  
384 network structure, particularly on the weighted structure, as pollinators respond to the plant  
385 invasion by reassigning their foraging efforts from the native to the non-native plants.

386 Our results also show that plant richness increases the robustness of plant-pollinator  
387 networks to the introduction of alien plants, which is consistent with Elton's (1958) prediction of  
388 richer systems being more robust to species invasions than poorer systems. That is, the more  
389 plant species in the network the smaller the effect of the introduced non-native plant on the  
390 natives. Finally, to our knowledge, ours is the first study suggesting that the cost of too many  
391 visits can affect the invasion success of non-native plants. This initial introduction process into  
392 plant-pollinator networks is difficult to study empirically because it would require to conduct the  
393 study during the first arrival of the non-native plant, or deliberately introduce the plants, which  
394 possess ethical problems. Therefore, our study also exemplifies how theoretical work can  
395 promote new thinking and research in areas traditionally studied empirically. Moreover, our

396 work can guide future empirical research by identifying mechanisms that can be affecting the  
397 invasions success of non-native plants and their impacts on natives.

398         Our study is limited to the analysis of non-native plants introduced only once and in very  
399 small numbers. This type of introduction is at the core of our results showing that generalist  
400 plants are less successful to invade the networks than specialist plants. Our results suggest that  
401 the common finding of invasive species often exhibiting “highly generalized floral traits” (e.g.,  
402 radial symmetry; reviewed in Parra-Tabla and Arceo-Gómez 2021), might be explained by those  
403 taxa being introduced several times and at larger numbers than those we simulated here. In fact,  
404 our results are consistent with those of the analysis conducted by Albrecht et al. (2014) across  
405 several plant-pollinator systems showing that generalized invasive plants receive more visits than  
406 specialized invasive plants. The persistence of the generalized invasive plants at early stages  
407 right after their introduction (as opposed to our results showing that generalist species introduced  
408 slightly above their extinction threshold, receiving too many visits, and not producing enough  
409 floral rewards often go extinct) might be explained by frequent introductions or introductions at  
410 higher abundance.

411         Overall, our work contributes in promoting new thinking to integrate theoretical and  
412 empirical research during the transient dynamics of ecological networks, and calls for evaluating  
413 the impact of invasive plants not only on visitation rates and network structure, but also on the  
414 demographics of native plants, which depend on other processes beyond animal visitation  
415 including seed production and recruitment.

416

417 **References**

- 418
- 419 Abbott, K. C., K. Cuddington, and A. Hastings. 2021. Transients in ecology: stochasticity,  
420 management, and understanding. *Theoretical Ecology* 14:623–624.
- 421 Aizen, M. A., C. L. Morales, and J. M. Morales. 2008. Invasive Mutualists Erode Native  
422 Pollination Webs. *PLoS Biology* 6:e31.
- 423 Aizen, M. A., C. L. Morales, D. P. Vázquez, L. A. Garibaldi, A. Sáez, and L. D. Harder. 2014.  
424 When mutualism goes bad: density-dependent impacts of introduced bees on plant  
425 reproduction. *New Phytologist* 204:322–328.
- 426 Albrecht, M., B. Padrón, I. Bartomeus, and A. Traveset. 2014. Consequences of plant invasions  
427 on compartmentalization and species' roles in plant–pollinator networks. *Proceedings of*  
428 *the Royal Society B: Biological Sciences* 281:20140773.
- 429 Arceo-Gómez, G., and T.-L. Ashman. 2016. Invasion status and phylogenetic relatedness predict  
430 cost of heterospecific pollen receipt: implications for native biodiversity decline. *Journal*  
431 *of Ecology* 104:1003–1008.
- 432 Bartomeus, I., M. Vilà, and L. Santamaría. 2008. Contrasting effects of invasive plants in plant–  
433 pollinator networks. *Oecologia* 155:761–770.
- 434 Bascompte, J., P. Jordano, and J. M. Olesen. 2006. Asymmetric Coevolutionary Networks  
435 Facilitate Biodiversity Maintenance. *Science* 312:431–433.
- 436 Bastolla, U., M. A. Fortuna, A. Pascual-García, A. Ferrera, B. Luque, and J. Bascompte. 2009.  
437 The architecture of mutualistic networks minimizes competition and increases  
438 biodiversity. *Nature* 458:1018–1020.

- 439 Carvalho, L. G., E. R. M. Barbosa, and J. Memmott. 2008. Pollinator networks, alien species  
440 and the conservation of rare plants: *Trinia glauca* as a case study. *Journal of Applied*  
441 *Ecology* 45:1419–1427.
- 442 Downey, P. O., and D. M. Richardson. 2016. Alien plant invasions and native plant extinctions:  
443 a six-threshold framework. *AoB Plants* 8:plw047.
- 444 Fortuna, M. A., and J. Bascompte. 2006. Habitat loss and the structure of plant–animal  
445 mutualistic networks. *Ecology Letters* 9:281–286.
- 446 Francis, T. B., K. C. Abbott, K. Cuddington, G. Gellner, A. Hastings, Y.-C. Lai, A. Morozov, S.  
447 Petrovskii, and M. L. Zeeman. 2021. Management implications of long transients in  
448 ecological systems. *Nature Ecology & Evolution* 5:285–294.
- 449 Ghazoul, J. 2002. Flowers at the front line of invasion? *Ecol. Ecological Entomology* 27:638–  
450 640.
- 451 Hastings, A., K. C. Abbott, K. Cuddington, T. B. Francis, Y.-C. Lai, A. Morozov, S. Petrovskii,  
452 and M. L. Zeeman. 2021. Effects of stochasticity on the length and behaviour of  
453 ecological transients. *Journal of The Royal Society Interface* 18:20210257.
- 454 Hastings, A., K. C. Abbott, K. Cuddington, T. Francis, G. Gellner, Y.-C. Lai, A. Morozov, S.  
455 Petrovskii, K. Scranton, and M. L. Zeeman. 2018. Transient phenomena in ecology.  
456 *Science* 361:eaat6412.
- 457 Jordano, P., J. Bascompte, and J. M. Olesen. 2003. Invariant properties in coevolutionary  
458 networks of plant–animal interactions. *Ecology Letters* 6:69–81.
- 459 Kaiser-Bunbury, C. N., J. Mougai, A. E. Whittington, T. Valentin, R. Gabriel, J. M. Olesen, and  
460 N. Blüthgen. 2017. Ecosystem restoration strengthens pollination network resilience and  
461 function. *Nature* 542:223–227.

- 462 Kaiser-Bunbury, C. N., T. Valentin, J. Mougale, D. Matatiken, and J. Ghazoul. 2011. The  
463 tolerance of island plant-pollinator networks to alien plants: Plant invasion and  
464 pollination networks. *Journal of Ecology* 99:202–213.
- 465 Lopezaraiza-Mikel, M. E., R. B. Hayes, M. R. Whalley, and J. Memmott. 2007. The impact of  
466 an alien plant on a native plant–pollinator network: an experimental approach. *Ecology*  
467 *Letters* 10:539–550.
- 468 Montero-Castaño, A., and M. Vilà. 2017. Influence of the honeybee and trait similarity on the  
469 effect of a non-native plant on pollination and network rewiring. *Functional Ecology*  
470 31:142–152.
- 471 Morales, C. L., and A. Traveset. 2009. A meta-analysis of impacts of alien vs. native plants on  
472 pollinator visitation and reproductive success of co-flowering native plants. *Ecology*  
473 *Letters* 12:716–728.
- 474 Morozov, A., K. Abbott, K. Cuddington, T. Francis, G. Gellner, A. Hastings, Y.-C. Lai, S.  
475 Petrovskii, K. Scranton, and M. L. Zeeman. 2020. Long transients in ecology: Theory and  
476 applications. *Physics of Life Reviews* 32:1–40.
- 477 Morris, W. F., D. P. Vázquez, and N. P. Chacoff. 2010. Benefit and cost curves for typical  
478 pollination mutualisms. *Ecology* 91:1276–1285.
- 479 Muñoz, A. A., and L. A. Cavieres. 2008. The presence of a showy invasive plant disrupts  
480 pollinator service and reproductive output in native alpine species only at high densities.  
481 *Journal of Ecology* 96:459–467.
- 482 Padrón, B., A. Traveset, T. Biedenweg, D. Díaz, M. Nogales, and J. M. Olesen. 2009. Impact of  
483 Alien Plant Invaders on Pollination Networks in Two Archipelagos. *PLoS ONE* 4:e6275.

- 484 Parra-Tabla, V., C. Alonso, T.-L. Ashman, R. A. Raguso, C. Albor, P. Sosenski, D. Carmona,  
485 and G. Arceo-Gómez. 2021. Pollen transfer networks reveal alien species as main  
486 heterospecific pollen donors with fitness consequences for natives. *Journal of Ecology*  
487 109:939–951.
- 488 Parra-Tabla, V., D. Angulo-Pérez, C. Albor, M. J. Campos-Navarrete, J. Tun-Garrido, P.  
489 Sosenski, C. Alonso, T.-L. Ashman, and G. Arceo-Gómez. 2019. The role of alien  
490 species on plant-floral visitor network structure in invaded communities. *PLOS ONE*  
491 14:e0218227.
- 492 Parra-Tabla, V., and G. Arceo-Gómez. 2021. Impacts of plant invasions in native plant–  
493 pollinator networks. *New Phytologist* 230:2117–2128.
- 494 Pascual-García, A., and U. Bastolla. 2017. Mutualism supports biodiversity when the direct  
495 competition is weak. *Nature Communications* 8:14326.
- 496 Pyšek, P., V. Jarošík, M. Chytrý, J. Danihelka, I. Kühn, J. Pergl, L. Tichý, J. C. Biesmeijer, W.  
497 N. Ellis, W. E. Kunin, and J. Settele. 2011. Successful invaders co-opt pollinators of  
498 native flora and accumulate insect pollinators with increasing residence time. *Ecological*  
499 *Monographs* 81:277–293.
- 500 Pyšek, P., D. M. Richardson, J. Pergl, V. Jarošík, Z. Sixtová, and E. Weber. 2008. Geographical  
501 and taxonomic biases in invasion ecology. *Trends in Ecology & Evolution* 23:237–244.
- 502 Richardson, D. M., N. Allsopp, C. M. D’antonio, S. J. Milton, and M. Rejmánek. 2000. Plant  
503 invasions — the role of mutualisms. *Biological Reviews* 75:65–93.
- 504 de Santiago-Hernández, M. H., S. Martén-Rodríguez, M. Lopezaraiza-Mikel, K. Oyama, A.  
505 González-Rodríguez, and M. Quesada. 2019. The role of pollination effectiveness on the



- 506 attributes of interaction networks: from floral visitation to plant fitness. *Ecology*  
507 100:e02803.
- 508 Seitz, N., D. vanEngelsdorp, and S. D. Leonhardt. 2020. Are native and non-native pollinator  
509 friendly plants equally valuable for native wild bee communities? *Ecology and Evolution*  
510 10:12838–12850.
- 511 Thompson, A. H., and T. M. Knight. 2018. Exotic plant species receive adequate pollinator  
512 service despite variable integration into plant–pollinator networks. *Oecologia* 187:135–  
513 142.
- 514 Traveset, A., R. Heleno, S. Chamorro, P. Vargas, C. K. McMullen, R. Castro-Urgal, M. Nogales,  
515 H. W. Herrera, and J. M. Olesen. 2013. Invaders of pollination networks in the Galápagos  
516 Islands: emergence of novel communities. *Proceedings of the Royal Society B:*  
517 *Biological Sciences* 280:20123040.
- 518 Traveset, A., and D. Richardson. 2006. Biological invasions as disruptors of plant reproductive  
519 mutualisms. *Trends in Ecology & Evolution* 21:208–216.
- 520 Traveset, A., and D. M. Richardson. 2014. Mutualistic Interactions and Biological Invasions.  
521 *Annual Review of Ecology, Evolution, and Systematics* 45:89–113.
- 522 Tylianakis, J. M., R. K. Didham, J. Bascompte, and D. A. Wardle. 2008. Global change and  
523 species interactions in terrestrial ecosystems. *Ecology Letters* 11:1351–1363.
- 524 Valdovinos, F. S., E. L. Berlow, P. Moisset de Espanés, R. Ramos-Jiliberto, D. P. Vázquez, and  
525 N. D. Martinez. 2018. Species traits and network structure predict the success and  
526 impacts of pollinator invasions. *Nature Communications* 9:2153.
- 527 Valdovinos, F. S., B. J. Brosi, H. M. Briggs, P. Moisset de Espanés, R. Ramos-Jiliberto, and N.  
528 D. Martinez. 2016. Niche partitioning due to adaptive foraging reverses effects of

529            nestedness and connectance on pollination network stability. *Ecology Letters* 19:1277–  
530            1286.

531    Valdovinos, F. S., and R. Marsland. 2020. Niche Theory for Mutualism: A Graphical Approach  
532            to Plant-Pollinator Network Dynamics. *The American Naturalist*:000–000.

533    Valdovinos, F. S., P. Moisset de Espanés, J. D. Flores, and R. Ramos-Jiliberto. 2013. Adaptive  
534            foraging allows the maintenance of biodiversity of pollination networks. *Oikos* 122:907–  
535            917.

536    Valdovinos, F. S., R. Ramos-Jiliberto, J. D. Flores, C. Espinoza, and G. López. 2009. Structure  
537            and dynamics of pollination networks: the role of alien plants. *Oikos* 118:1190–1200.

538    Vilà, M., I. Bartomeus, A. C. Dietzsch, T. Petanidou, I. Steffan-Dewenter, J. C. Stout, and T.  
539            Tscheulin. 2009. Invasive plant integration into native plant–pollinator networks across  
540            Europe. *Proceedings of the Royal Society B: Biological Sciences* 276:3887–3893.

541  
542  
543  
544
